# Supplementary material for: Similarities and differences between selective and nonselective BAFF blockade in murine SLE
Source: JCI journal article supplement (doi:10.1172/jci26385), 2006-02-16
Supplement: sd1 [file 1]

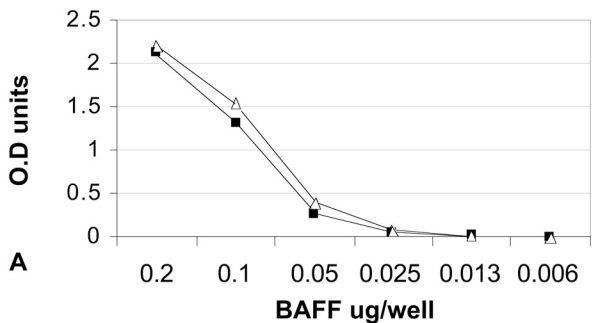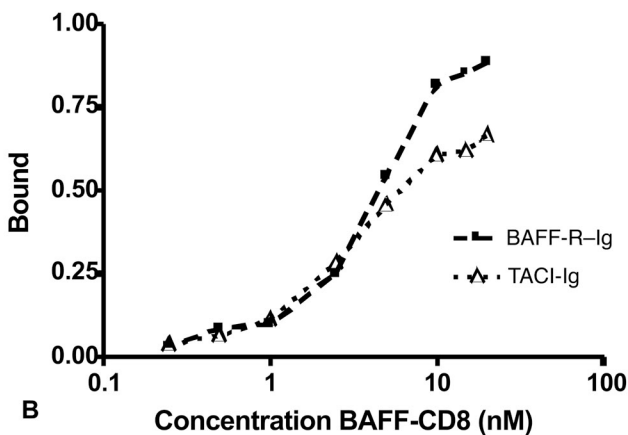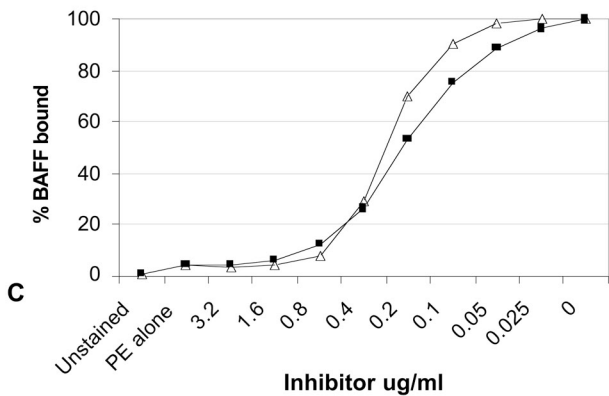

Supplementary data Figure 1: Similar BAFF binding characteristics of TACI-Ig and BAFF-R-Ig: Panel A: Binding of soluble BAFF to immobilized BAFF-R-Ig and TACI-Ig. Panel B: Inhibition curve of binding of a fixed concentration of TACI-Ig or BAFF-R-Ig to immobilized BAFF-CD8 using increasing concentrations of soluble BAFF-CD8 as inhibitor. Panel C: Inhibition of binding of soluble BAFF-biotin to BJAB cells that express only BAFF-R, by increasing concentrations of BAFF-R-Ig or TACI-Ig. An irrelevant fusion protein at 3.2 $\mu$ g/ml did not inhibit BAFF binding. BAFF binding was detected by flow cytometry and percent inhibition calculated as  $100 - 100(\text{MFI}_{\text{experimental}} / \text{MFI}_{\text{no inhibitor}})$ .
